# Supplementary material for: A low-cost and high performance ball-milled Si-based negative electrode for high-energy Li-ion batteries
Source: Royal Society of Chemistry journal article supplement (doi:10.1039/c3ee41318g), 2013-01-01
Supplement: c3ee41318g.pdf [file c3ee41318g.pdf]

## Supplementary information

**Comparison of the performance of our micrometric Si-based electrode with that of state-of-the-art nanostructured Si anodes.**

| reference                                              | Active material       | Specific capacity (mAh/g electrode) | Surface capacity <sup>1</sup> (mAh/cm <sup>2</sup> electrode) |
|--------------------------------------------------------|-----------------------|-------------------------------------|---------------------------------------------------------------|
| Present work                                           | Micrometric Si powder | 1170 (600 cycles)                   | 0.82 (600 cycles)                                             |
| Liu et al., <i>Adv. Mater.</i> 23 (2011) 4679          | Nanometric Si powder  | 1400 (650 cycles)                   | 0.42 (650 cycles)                                             |
| Kovenlenko et al, <i>Science</i> 334 (2011) 75         | Nanometric Si powder  | 770 (1300 cycles)                   | ?                                                             |
| Koo et al, <i>Angew. Chem. Int. Ed.</i> 51 (2012) 8762 | Nanometric Si powder  | 1200 (100 cycles)                   | ?                                                             |
| H. Wu et al., <i>Nat. Nano.</i> , 7, (2012) 310.       | Si nanotubes          | 1500 (600 cycles)                   | 0.15 (600 cycles)                                             |

<sup>1</sup> The surface capacity is obtained by the multiplication of the specific capacity by the electrode loading.

### Production cost estimation

The cost estimation for the industrial production of nanostructured Si powder by milling was determined from contact with suppliers of industrial ball-millers and from our previous experiences on the production at pilot-scale using attritor-type (Union Process) millers of various nanostructured powders (Cu-based and Ti-based alloys) previously synthesized at laboratory scale using a vibratory-type (Spex) miller.

The cost estimation is based on a daily production of 100 kg of Si powder using a SD-100 attritor from Union Process ([www.unionprocess.com](http://www.unionprocess.com)). In first approximation, the milling duration to produce nanostructured Si powder from metallurgical-grade Si powder using this apparatus was estimated at 24 h.

The cost of the starting metallurgical-grade Si powder was not included in the calculation (cost estimated at 2 \$ / kg).

|                                                      |                                                 | Daily cost (for 100 kg per day) |
|------------------------------------------------------|-------------------------------------------------|---------------------------------|
| equipment (SD-100 from Union Process)                | 140 000 \$ (service life estimated at 10 years) | 38 \$ <sup>a</sup>              |
| Consumables (balls, argon, process control agent...) | 30 000 \$/year                                  | 82 \$ <sup>b</sup>              |

|             |             |                                      |
|-------------|-------------|--------------------------------------|
| Labor       | 50 \$/h     | 100 \$ <sup>c</sup>                  |
| Electricity | 0.05 \$/kWh | 28 \$ <sup>d</sup>                   |
| TOTAL       |             | ~250 \$ / 100 kg Si<br>= ~2 euros/kg |

<sup>a</sup>  $140\,000 / (10 \times 365)$

<sup>b</sup>  $30\,000 / 365$

<sup>c</sup> based on 2 h of labor per day (1 h for filling the tank and starting the miller and 1 h to empty the milled powder from the tank)

<sup>d</sup>  $40A \times 575V \times 24h \times 0.05\$/1000$
